# Supplementary material for: Modification of Vip3Ab1 C-Terminus Confers Broadened Plant Protection from Lepidopteran Pests
Source: MDPI journal article supplement (doi:10.3390/toxins11060316), 2019-06-03
Supplement: s1 [file s1]

# Supplementary Materials: Modification of Vip3Ab1 C-Terminus Confers Broadened Plant Protection from Lepidopteran Pests

Megan S. Sopko \*, Kenneth E. Narva, Andrew J. Bowling, Heather E. Pence, James J. Hasler, Theodore J. Letherer, Cory M. Larsen and Marc D. Zack \*

Table S1. PCR primer sequences used to generate Vip3Ab1-740.

| Primer Name                   |                                                                               |
|-------------------------------|-------------------------------------------------------------------------------|
| Vip3Ab1 Part A Forward Primer | 5' GGA TCC GAA GGA GAT ATA CAT ATG GCA AAC ATG AAC AAC ACC AAA CTG AAC GCG 3' |
| Vip3Ab1 Part A Reverse Primer | 5' TCC AGT ATT TTC ATC TTT CAA GTA GAT TGA CGC CTT 3'                         |
| DIG740 Part B Forward Primer  | 5' AAG GCG TCA ATC TAC TTG AAA GAT GAA AAT ACT GGA 3'                         |
| DIG740 Part B Reverse Primer  | 5' GGA TCC CTA TTT AAT AGA AAT GTT TTC 3'                                     |

Table S2. PCR primer sequences for Arabidopsis copy number analysis.

| Primer Name          |                              |
|----------------------|------------------------------|
| DSM2 forward Primer  | 5' CTTACGCTCCCTCTTCGA 3'     |
| DSM2 reverse Primer  | 5' CTGAGCAATGCCAGCATAGG 3'   |
| TafII forward Primer | 5' GAGGATTAGGGTTTCAACGGAG 3' |
| TafII reverse Primer | 5' GAGAATTGAGCTGAGACGAGG 3'  |

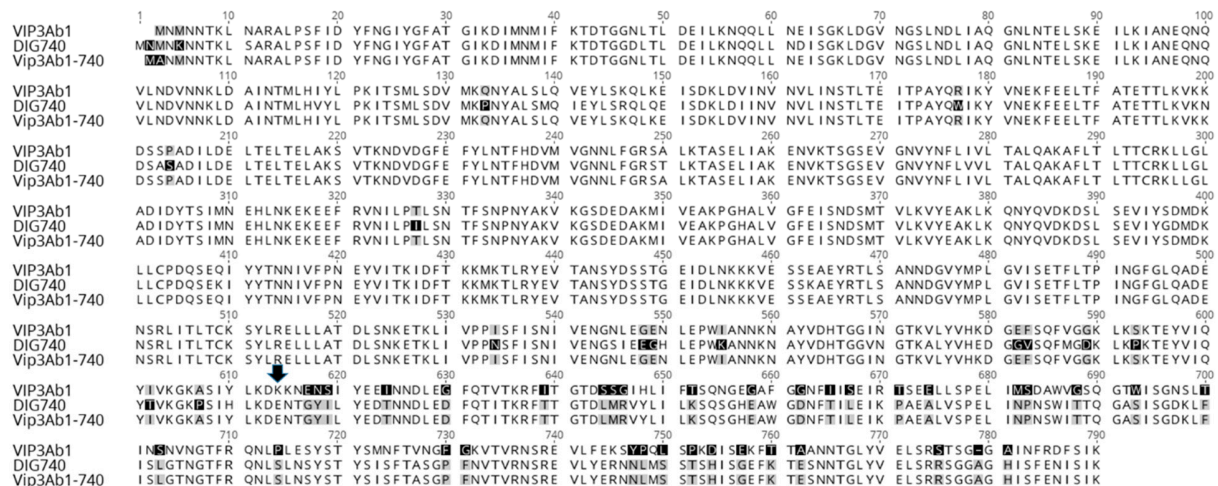

Figure S1. Sequence alignment of Vip3Ab1, DIG740 (Vip3Ai1) and Vip3Ab1-740. The black arrow denotes the location at which the chimera protein was generated. Black background shading is used to highlight amino acid diversity between proteins (BLOSUM62 substitution matrix).

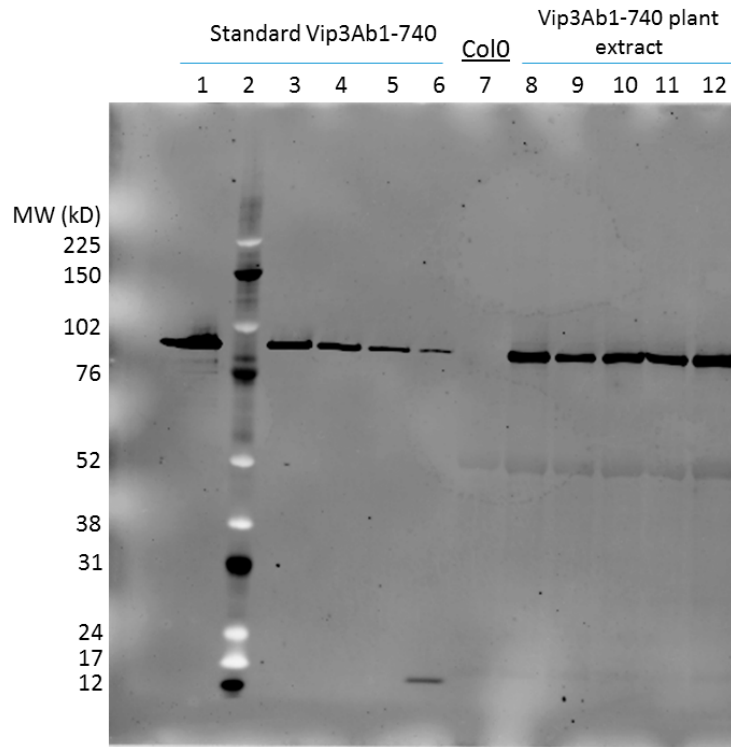

**Figure S2.** Representative Western Blot of Arabidopsis leaf extracts. “Col0” denotes Columbia-0 plant extract control to show background immunoreactivity of non-transformed Arabidopsis plants.

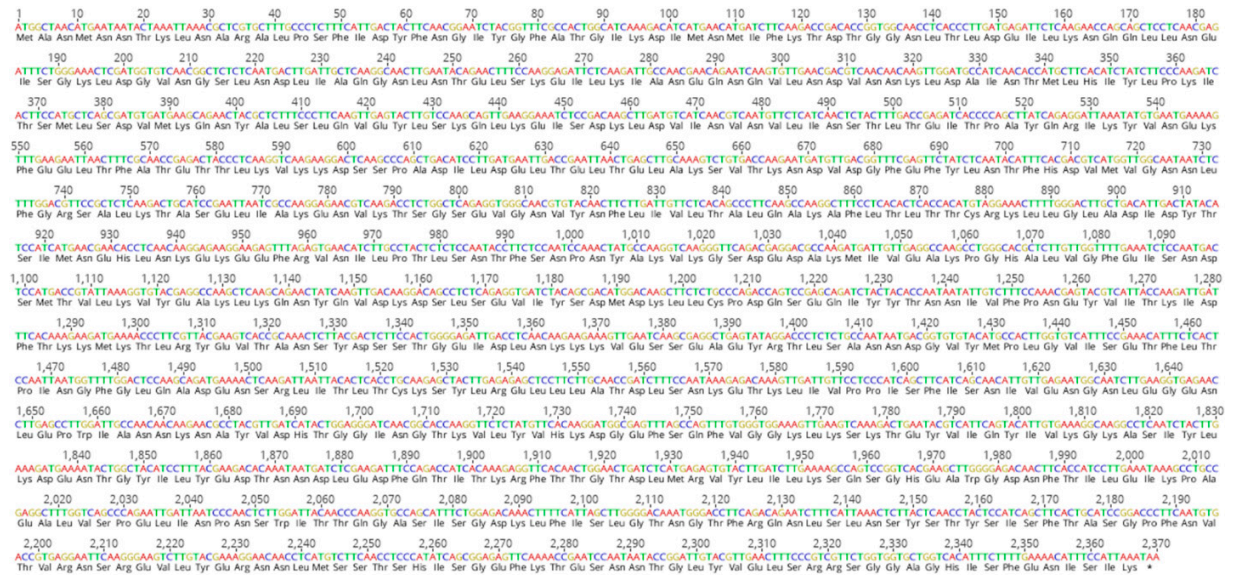

**Figure S3.** DNA sequence for Vip3Ab1-740 plant expression construct.
